# Supplementary material
Source: PubMed Central journal article supplement (PMC2879755)
Supplement: tpc.110.074385_1.pdf [file tpc.110.074385_1.pdf]

RTNLB1

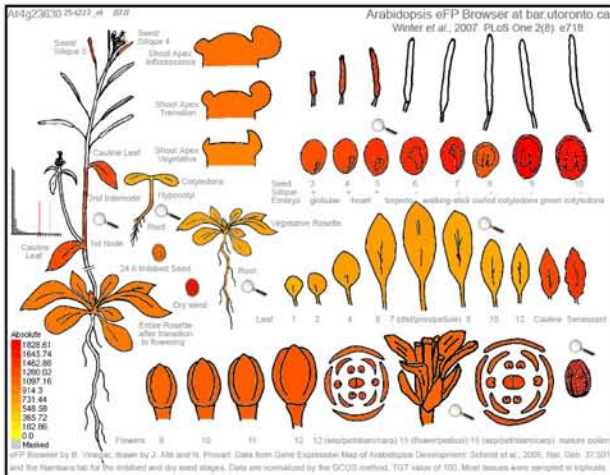

RTNLB2

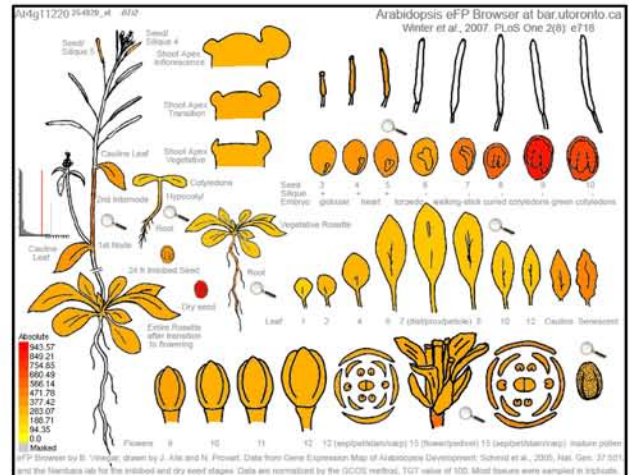

RTNLB3

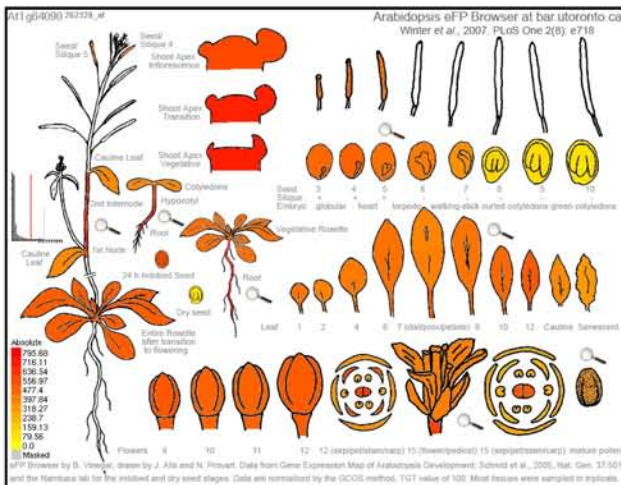

RTNLB4

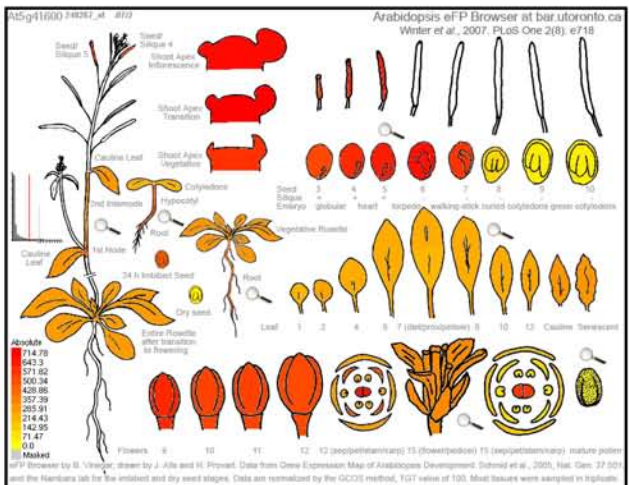

RTNLB13

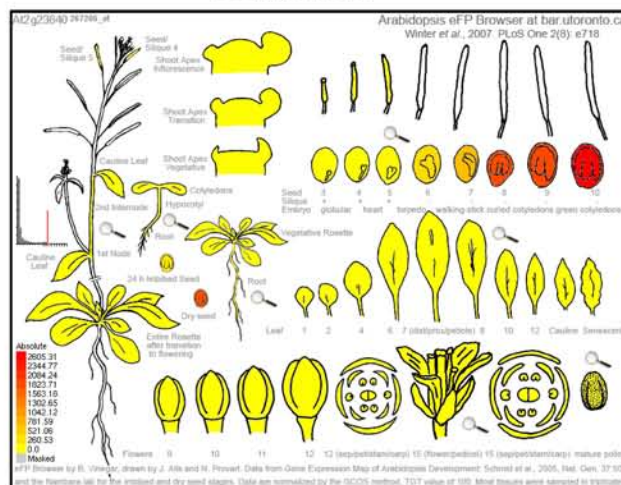

Supplemental figure 1. eFP browser expression predictions for RTNLB1-4 and 13 RTNLB anatomical expression maps were generated using the Arabidopsis eFP browser (Winter et al., 2007) (<http://bar.utoronto.ca/efp/cgi-bin/efpWeb.cgi>).

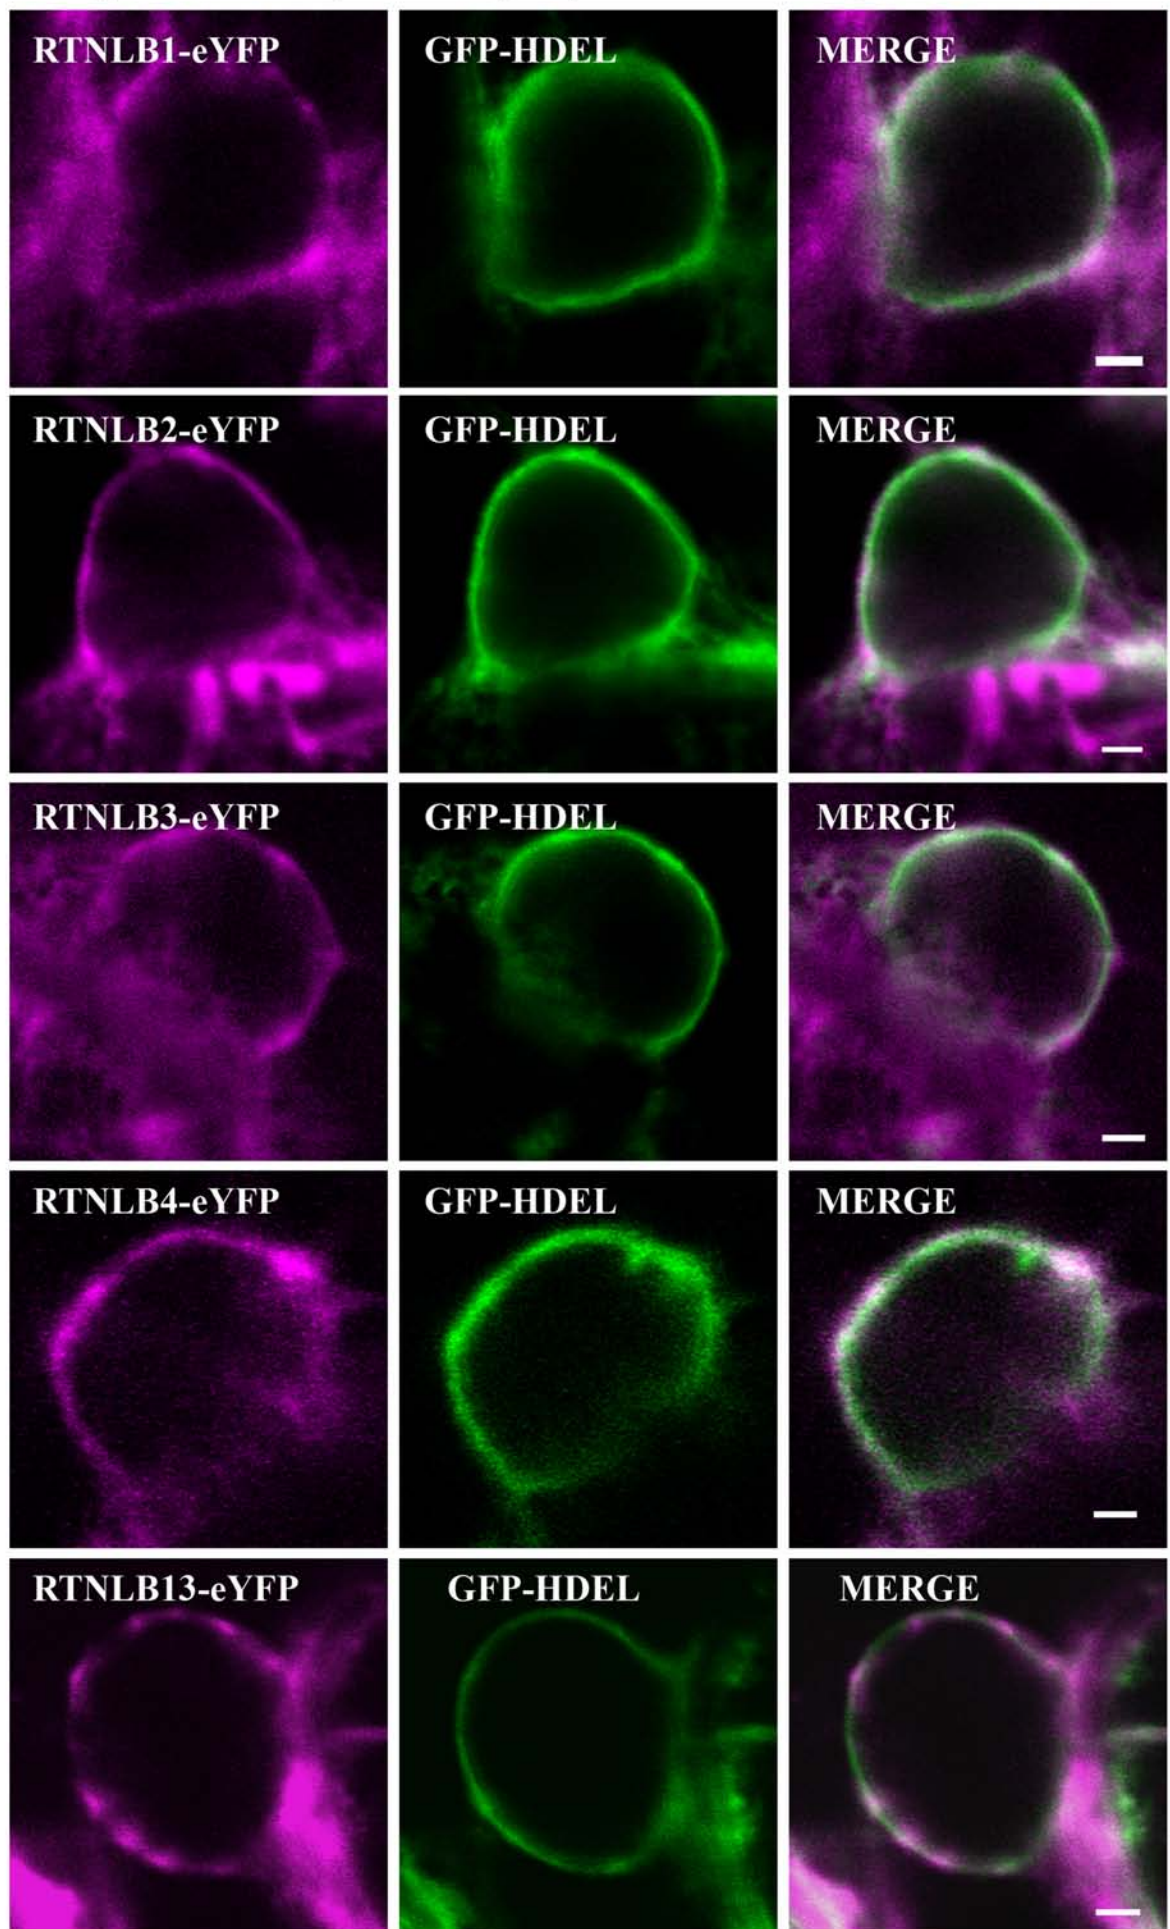

Supplemental figure 2a. RTNLB1-4,13 collocate to the ER continuous with the nuclear envelope. RTNLB1-4,13 fusions to eYFP were transiently coexpressed with GFP-HDEL in tobacco epidermal cells. Images indicate that all RTNLB fusions locate to the ER continuous with the nuclear envelope. Scale bar 2μm.

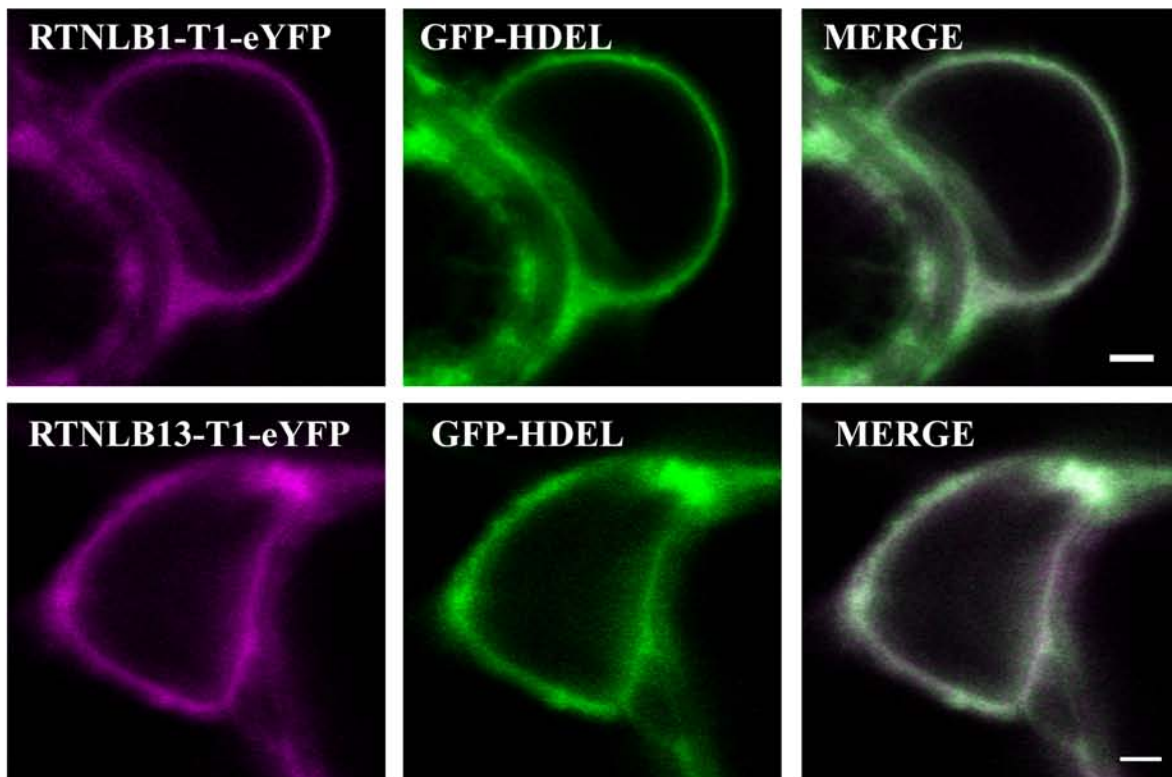

Supplemental figure 2b. RTNLB1 and 13 truncation 1 collocate to the ER continuous with the nuclear envelope.

RTNLB1 and 13 truncation 1 fusions to eYFP were transiently coexpressed with GFP-HDEL in tobacco epidermal cells. Images indicate that both truncated RTNLB fusions locate to the ER continuous with the nuclear envelope. Scale bar 2 $\mu$ m.

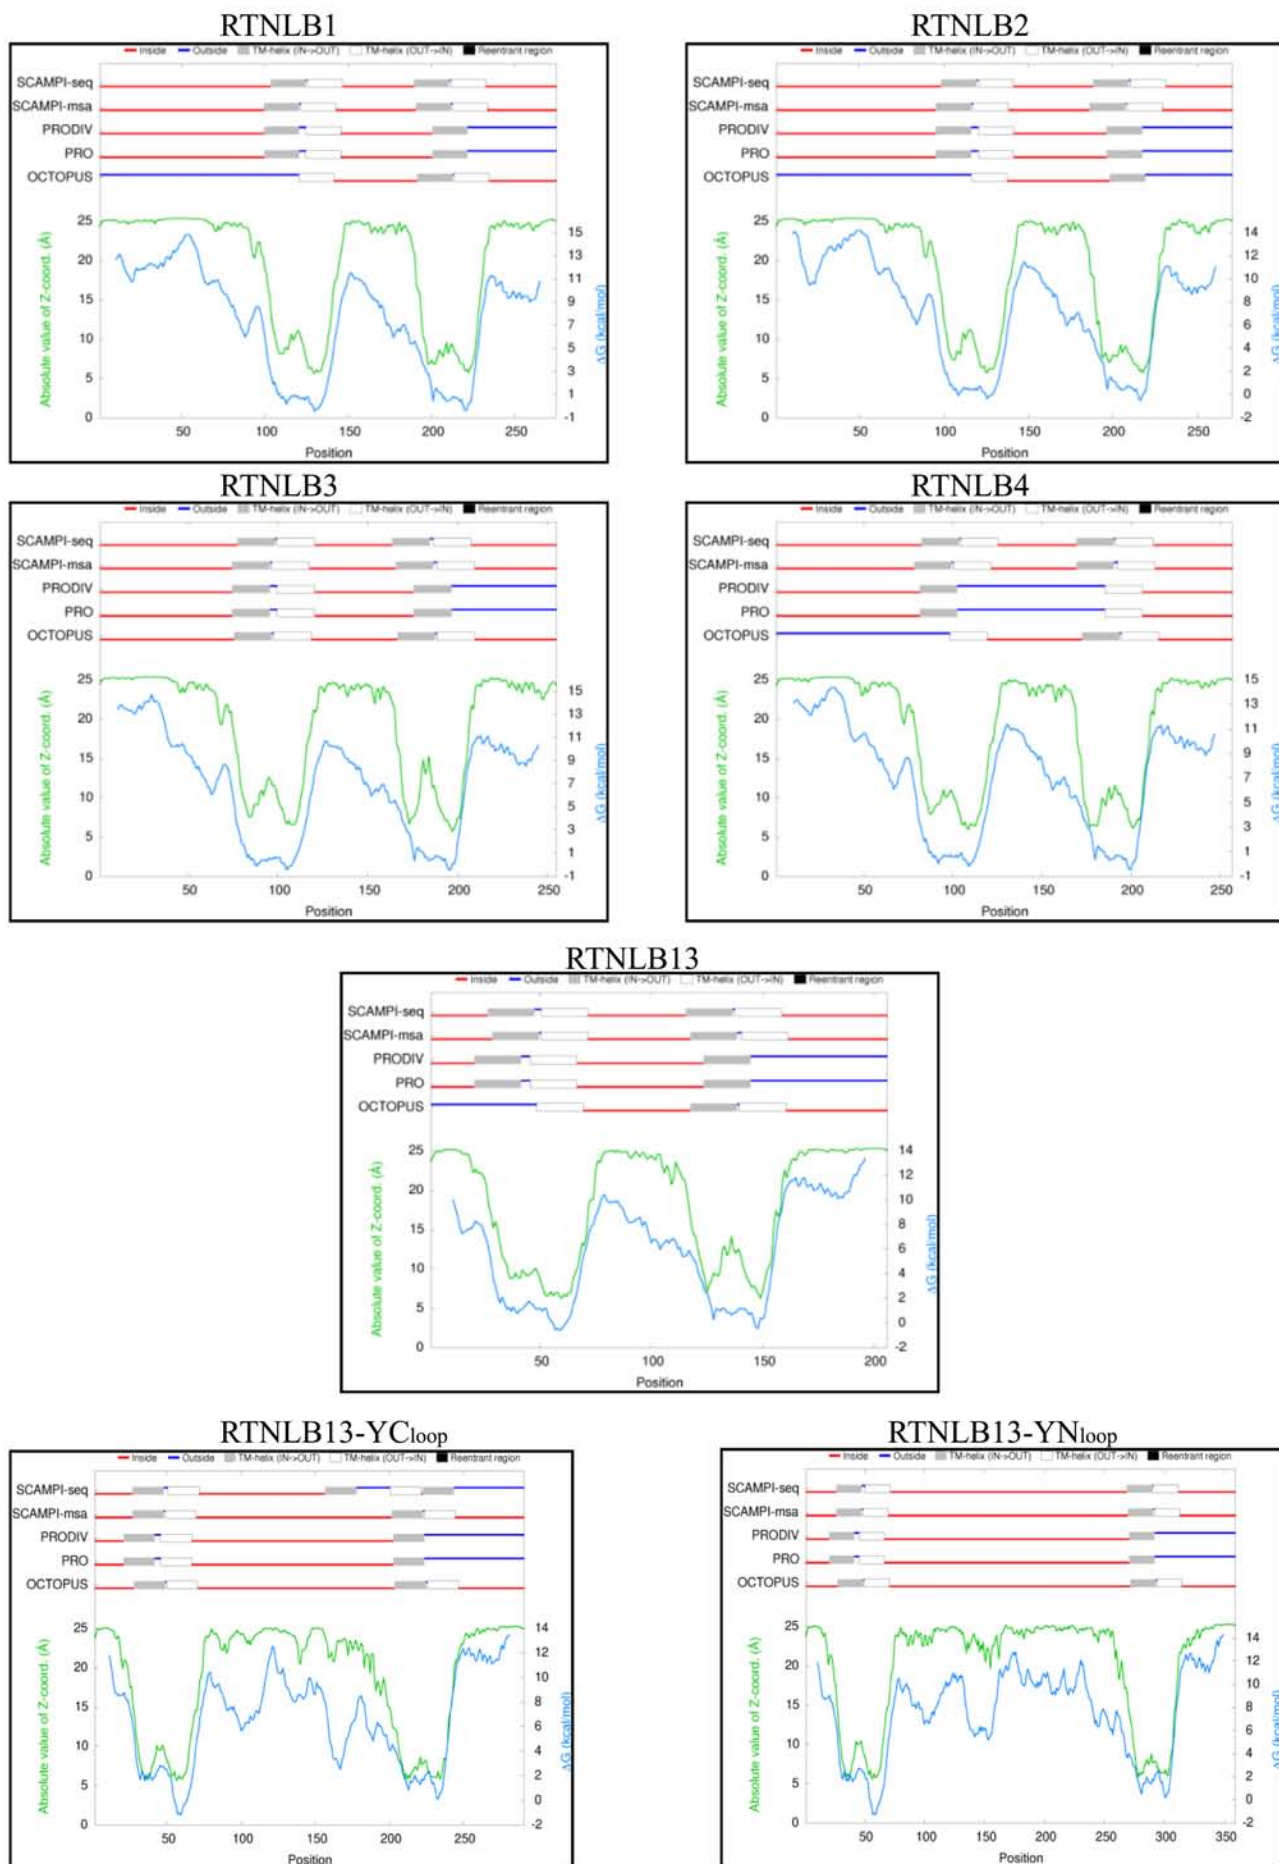

Supplemental figure 3. Bioinformatic topology predictions for the RTNLB isoforms under study. Predicted topology outputs from TOPCONS (<http://topcons.cbr.su.se/>) are shown for the five RTNLB proteins under study and the two loop-YFP fusions used for BiFC (fig. 4C). Note that the fusion of the YFP half-barrels to RTNLB13 does not seem to affect its transmembrane topology.

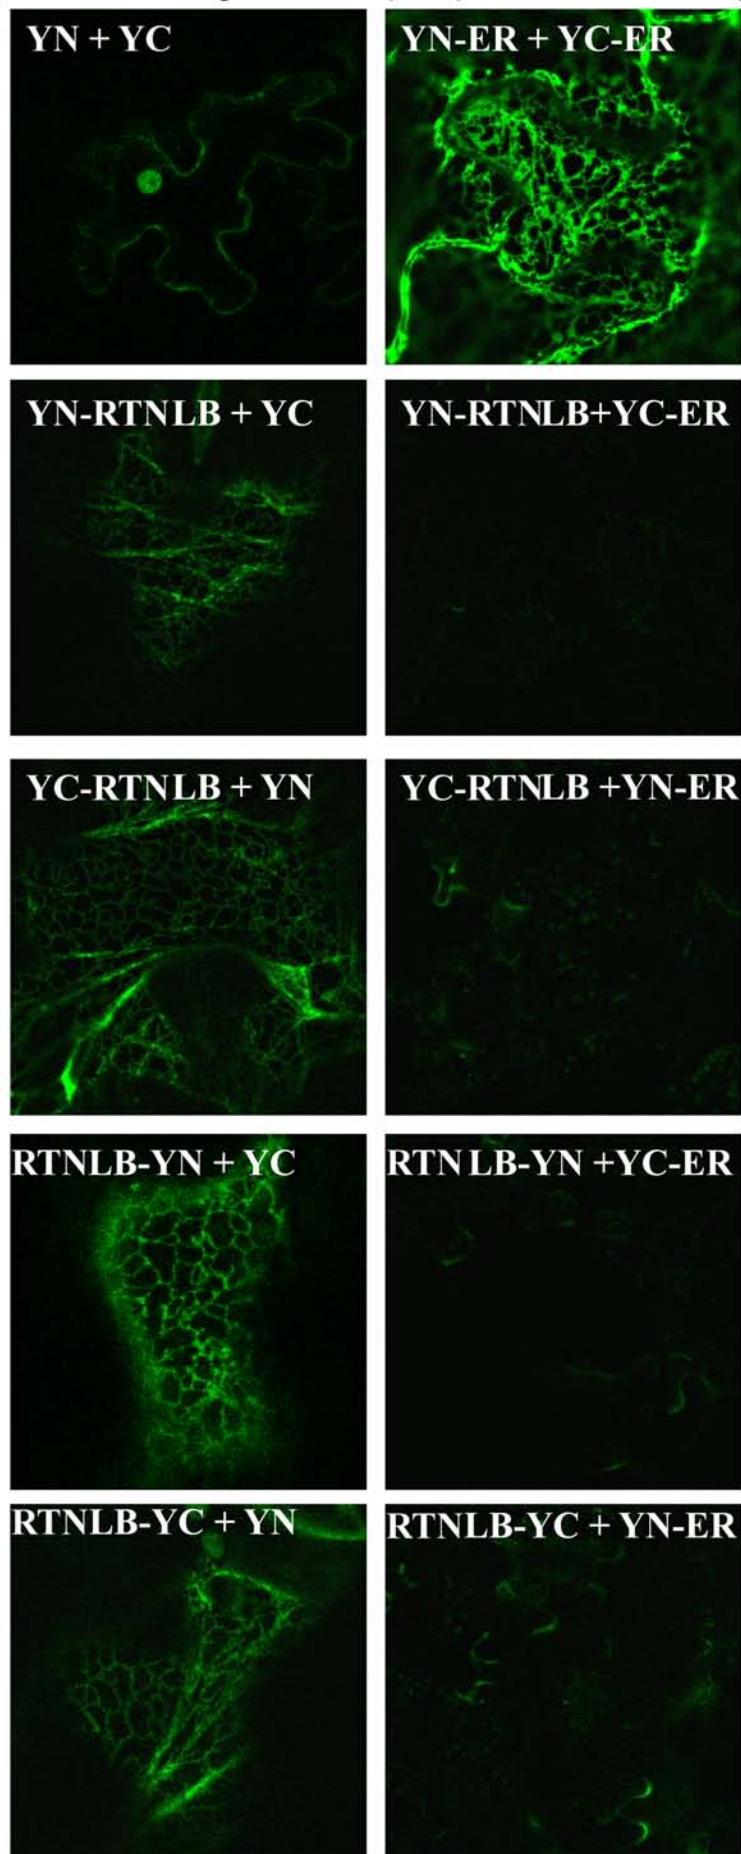

Supplemental figure 4. BiFC controls and N and C terminal topology

The indicated construct combinations in agrobacterium were infiltrated in tobacco epidermal cells and YFP detected by confocal microscopy. YN and YC indicate the N-terminal and C-terminal half barrels of YFP, respectively. The C-terminal ER retention signal HDEL was added to the above to yield YN-ER and YC-ER, respectively (Zamyatnin et al., 2006). Note that BiFC signals are only observed when the YFP halves fused to the N or C-terminal domains of RTNLB13 are coexpressed with their cytosolic, but not ER-located, counterparts.

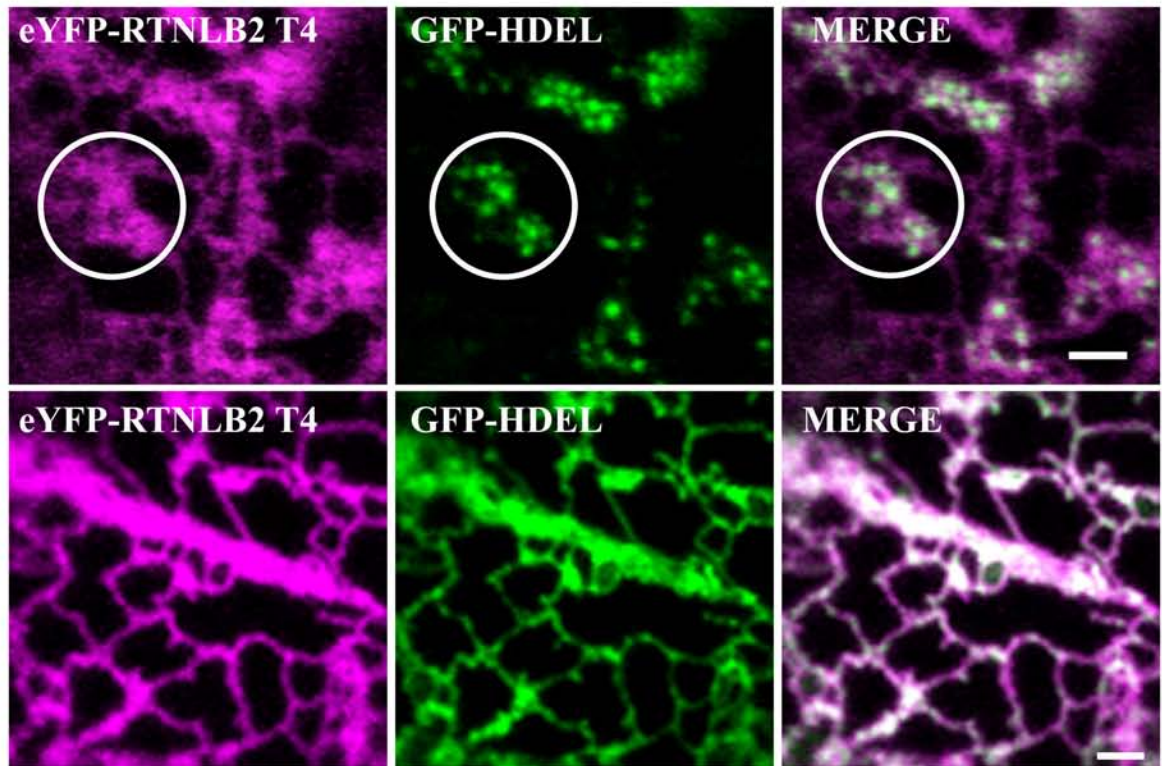

Supplemental figure 5. eYFP-RTNLB2 truncation 4 affects the cortical ER. eYFP-RTNLB2 truncation 4 (magenta) was transiently coexpressed with GFPHDEL (green) in tobacco epidermal cells. On rare occasions RTNLB2 truncation resulted in constriction of the luminal ER marker over cisternal regions of ER (circle), whereas in the vast majority of cells it collocated to and did not constrict the ER (lower panels). Scale bar 2 $\mu$ m.

**Supplemental Table 1.**

| PRIMER    | SEQUENCE (5' TO 3')                                                  |
|-----------|----------------------------------------------------------------------|
| RTN1F     | GGGGACAAGTTTGTACAAAAAAGCAGGCTTCCCGCCAATGGCGGAAG AACATAAGC            |
| RTN1RN    | GGGGACCACTTTGTACAAGAAAGCTGGGTCTAATCTTTCTTCTTG                        |
| RTN1RC    | GGGGACCACTTTGTACAAGAAAGCTGGGTCACTTTTCTTCTTG                          |
| RTN1T1    | GGGGACCACTTTGTACAAGAAAGCTGGGTCTTTGGAGGGGACTTGTT                      |
| RTN1T2    | GGGGACCACTTTGTACAAGAAAGCTGGGTCCCTTCCTGATGCAATTTACG                   |
| RTN1T3    | GGGGACAAGTTTGTACAAAAAAGCAGGCTTCCCGCCATTCATTAACAAGTCCCCTCCA<br>AAG    |
| RTN1T4    | GGGGACAAGTTTGTACAAAAAAGCAGGCTTCCCGCCAAGGGATCTCAAGAAATTCCT<br>CATT    |
| RTN2F     | GGGGACAAGTTTGTACAAAAAAGCAGGCTTCCCGCCAATGGCGGATGAACATAAGC             |
| RTN2RN    | GGGGACCACTTTGTACAAGAAAGCTGGGTCTAATCCTTCTTCTTGTC                      |
| RTN2RC    | GGGGACCACTTTGTACAAGAAAGCTGGGTCACTTTCTTCTTGTC                         |
| RTN2T1    | GGGGACCACTTTGTACAAGAAAGCTGGGTCAATCTTTGGTGGAGACTT                     |
| RTN2T2    | GGGGACCACTTTGTACAAGAAAGCTGGGTCACTCCCTCCCGACGCAATC                    |
| RTN2T3    | GGGGACAAGTTTGTACAAAAAAGCAGGCTTCCCGCCAATTCACAAGTCTCCACCAAA<br>GATT    |
| RTN2T4    | GGGGACAAGTTTGTACAAAAAAGCAGGCTTCCCGCCAGATATCAAGAAGTTCCTCTCT<br>GCT    |
| RTN3F     | GGGGACAAGTTTGTACAAAAAAGCAGGCTTCCCGCCAATGGCGGAAG AGCACAAG             |
| RTN3RC    | GGGGACCACTTTGTACAAGAAAGCTGGGTCACTTTTCTTCTTG                          |
| RTN3RN    | SAME AS RTN                                                          |
| RTN3T1    | GGGGACCACTTTGTACAAGAAAGCTGGGTCAAGAGGTGACTTGTG                        |
| RTN3T2    | GGGGACCACTTTGTACAAGAAAGCTGGGTCACTCAGCAATCACCACAGAAAC                 |
| RTN3T3    | GGGGACAAGTTTGTACAAAAAAGCAGGCTTCCCGCCACACAAGTCACCTCTTCATATC<br>C      |
| RTN3T4    | GGGGACAAGTTTGTACAAAAAAGCAGGCTTCCCGCCAGGTTTATGGGTTTTGTCCAAA<br>GTT    |
| RTN4F     | GGGGACAAGTTTGTACAAAAAAGCAGGCTTCCCGCCAATGGTGGAAGACCACAAG              |
| RTN4RC    | GGGGACCACTTTGTACAAGAAAGCTGGGTCACTTTCTTCTTG                           |
| RTN4RN    | GGGGACCACTTTGTACAAGAAAGCTGGGTCTAATCCTTCTTCTTG                        |
| RTN4T1    | GGGGACCACTTTGTACAAGAAAGCTGGGTCTGAGGAGTTGACTTGTG                      |
| RTN4T2    | GGGGACCACTTTGTACAAGAAAGCTGGGTCTCCTGATGCAATGTTCTAAGAAG                |
| RTN4T3    | GGGGACAAGTTTGTACAAAAAAGCAGGCTTCCCGCCATTCATCCACAAGTCAACTCCT<br>CA     |
| RTN4T4    | GGGGACAAGTTTGTACAAAAAAGCAGGCTTCCCGCCAGGAAAAGATGTCAAGAAATT<br>TATCCTG |
| RTN13F    | GGGGACAAGTTTGTACAAAAAAGCAGGCTTCCCGCCAATGGCCAACGACGTGACCAA<br>AG      |
| RTN13R1   | GGGGACCACTTTGTACAAGAAAGCTGGGTCTCCACTACAACTCCTCCGATAC                 |
| RTN13R2   | GGGGACCACTTTGTACAAGAAAGCTGGGTCCAAGATCCAAAAACC                        |
| FWD       | GGGCTCGAGATGGCCAACGACGTGACCAA                                        |
| Fusion 1F | TCGGAGGAGTTTGTAGCCGACAAGCAGAAG                                       |
| Fusion 1R | CTTCTGCTTGTCGGCTACAACTCCTCCGA                                        |
| Fusion 2F | GACGAGCTGTACAAGGTGGAGACAGTGAGG                                       |
| Fusion 2R | CCTCACTGTCTCCACCTGTACAGCTCGTC                                        |
| REV       | CCCTCTAGACTACTCTGATTTTTTCACTTC                                       |

Supplemental Table 1. Primers used to generate full length and truncation clones.

Note, where F refers to the forward primer for N and C terminal fusions, RC refers to the reverse primer for a C terminal fusion, RN refers to the reverse primer for an N terminal fusion. RTN truncations are denoted by T followed by a number which corresponds with the schematic representation in figure 6. Truncation 1 and 2 are C terminal fusions and were amplified with the representative primer plus the C terminal F primer (e.g RTN1T1 amplified with RTN1T1 and RTN1F). Truncations 3 and 4 are N terminal fusions and were amplified with the representative primer in combination with the N terminal R primer (e.g RTN1T3 amplified with RTN1T3 and RTN1RN).
